# Supplementary material
Source: publisher figshare collection journal article supplement (https://karger.figshare.com/articles/dataset/_/5241871)
Supplement: Supplementary file 1 [file 1 › 000441098_sm_Erratum.PDF]

## Erratum

---

In the article by Krishnamurthi RV, Moran AE, Feigin VL, Barker-Collo S, Norrving B, Mensah GA, Taylor S, Naghavi M, Forouzanfar MH, Nguyen G, Johnson CO, Vos T, Murray CJ, Roth GA, and the GBD 2013 Stroke Panel Experts Group, entitled ‘Stroke prevalence, mortality and disability-adjusted life years in adults aged 20–64 years in 1990–2013: data from the Global Burden of Disease 2013 Study’ [Neuroepidemiology 2015;45:190–202, DOI: 10.1159/000441098], the value 92,665,770 needs to be corrected to 2,665,770 in the paragraph on trends 1990–2013. The corrected paragraph is as follows:

*Trends 1990–2013.* Globally, there were significant increases in both numbers of cases (table 1) and prevalence rates of both HS and IS between 1990 and 2013 (fig. 1). The number of prevalent HS cases increased significantly in developing countries between 1990 (1,450,240 (95% UI 1,391,277–1,510,464)) and 2013 (2,665,770 (95% UI 2,521,485–2,789,120)).
