# Supplementary material
Source: publisher figshare collection journal article supplement (https://karger.figshare.com/articles/dataset/_/5241871)
Supplement: Supplementary file 1 [file 1 › 000441098_sm_Table.pdf]

**Web Appendix Table 1. Age-standardised Death, prevalence and DALY rates per 100,000 for ischaemic and haemorrhagic stroke**

|               | Year | Sex    | Age      | Ischaemic Stroke |               |           |               | Hemorrhagic Stroke |                |           |               |
|---------------|------|--------|----------|------------------|---------------|-----------|---------------|--------------------|----------------|-----------|---------------|
|               |      |        |          | Developing       |               | Developed |               | Developing         |                | Developed |               |
|               |      |        |          | Mean             | 95% UI        | Mean      | 95% UI        | Mean               | 95% UI         | Mean      | 95% UI        |
| <b>Deaths</b> | 1990 | male   | 20 to 24 | 0.7              | 0.4 to 1.0    | 0.2       | 0.1 to 0.3    | 5                  | 4.0 to 6.3     | 1.3       | 1.0 to 1.6    |
|               |      | male   | 25 to 29 | 1                | 0.6 to 1.4    | 0.3       | 0.2 to 0.5    | 7.1                | 5.6 to 8.6     | 2.1       | 1.7 to 2.7    |
|               |      | male   | 30 to 34 | 1.8              | 1.2 to 2.6    | 0.7       | 0.5 to 1.0    | 11.2               | 9.0 to 14.1    | 4.3       | 3.3 to 5.4    |
|               |      | male   | 35 to 39 | 2.8              | 1.8 to 3.8    | 1.4       | 1.0 to 2.1    | 18.3               | 14.8 to 22.5   | 8.2       | 6.5 to 10.6   |
|               |      | male   | 40 to 44 | 5.3              | 3.3 to 7.5    | 3.1       | 2.1 to 4.6    | 30.7               | 24.4 to 37.3   | 15        | 11.8 to 19.0  |
|               |      | male   | 45 to 49 | 10.7             | 6.8 to 14.9   | 6.7       | 4.6 to 9.2    | 53.2               | 43.2 to 64.3   | 25.6      | 20.6 to 31.9  |
|               |      | male   | 50 to 54 | 30.1             | 20.7 to 39.6  | 24.4      | 17.6 to 31.9  | 87.4               | 71.2 to 104.7  | 39.5      | 30.3 to 49.4  |
|               |      | male   | 55 to 59 | 54.7             | 37.3 to 71.4  | 49        | 36.6 to 62.7  | 142.8              | 117.6 to 169.5 | 59.3      | 45.6 to 75.8  |
|               |      | male   | 60 to 64 | 105.5            | 75.1 to 137.0 | 109.2     | 83.1 to 134.7 | 238.3              | 193.9 to 281.7 | 92.6      | 67.5 to 121.4 |
|               |      | female | 20 to 24 | 0.6              | 0.3 to 1.0    | 0.2       | 0.1 to 0.3    | 3.1                | 2.1 to 4.0     | 1.1       | 0.8 to 1.5    |
|               |      | female | 25 to 29 | 0.8              | 0.5 to 1.5    | 0.3       | 0.2 to 0.4    | 4.6                | 3.3 to 6.0     | 1.7       | 1.3 to 2.3    |
|               |      | female | 30 to 34 | 1.4              | 0.8 to 2.3    | 0.5       | 0.3 to 0.7    | 7.8                | 5.9 to 9.8     | 3         | 2.3 to 4.0    |
|               |      | female | 35 to 39 | 2.1              | 1.3 to 3.3    | 0.8       | 0.6 to 1.2    | 13.1               | 10.4 to 16.7   | 5.4       | 4.2 to 6.9    |
|               |      | female | 40 to 44 | 4                | 2.5 to 5.9    | 1.6       | 1.1 to 2.3    | 24.7               | 20.0 to 30.5   | 10.2      | 8.0 to 12.7   |
|               |      | female | 45 to 49 | 7.3              | 4.9 to 10.4   | 3.4       | 2.2 to 4.8    | 43.7               | 35.4 to 53.8   | 18.3      | 14.1 to 21.7  |
|               |      | female | 50 to 54 | 22               | 15.4 to 29.2  | 13.2      | 9.0 to 17.9   | 70.4               | 57.7 to 85.4   | 29.5      | 22.3 to 34.4  |
|               |      | female | 55 to 59 | 38.5             | 26.1 to 52.2  | 27.6      | 19.3 to 34.9  | 110.7              | 89.2 to 132.3  | 43        | 31.5 to 50.9  |
|               |      | female | 60 to 64 | 78.7             | 54.5 to 105.3 | 67.3      | 48.0 to 81.6  | 189                | 155.0 to 231.9 | 69.3      | 52.2 to 82.3  |
|               |      | both   | 20 to 24 | 0.6              | 0.4 to 0.9    | 0.2       | 0.1 to 0.3    | 4.1                | 3.4 to 4.8     | 1.2       | 1.0 to 1.4    |
|               |      | both   | 25 to 29 | 0.9              | 0.7 to 1.2    | 0.3       | 0.2 to 0.4    | 5.9                | 4.9 to 6.9     | 1.9       | 1.6 to 2.3    |
|               |      | both   | 30 to 34 | 1.6              | 1.1 to 2.1    | 0.6       | 0.5 to 0.8    | 9.6                | 8.1 to 11.3    | 3.6       | 3.1 to 4.4    |
|               |      | both   | 35 to 39 | 2.5              | 1.8 to 3.2    | 1.1       | 0.9 to 1.5    | 15.8               | 13.6 to 18.5   | 6.8       | 5.8 to 8.1    |
|               |      | both   | 40 to 44 | 4.7              | 3.4 to 5.9    | 2.4       | 1.8 to 3.2    | 27.8               | 24.1 to 31.7   | 12.6      | 10.8 to 14.9  |
|               |      | both   | 45 to 49 | 9                | 6.6 to 11.5   | 5         | 3.7 to 6.5    | 48.6               | 42.2 to 55.8   | 21.9      | 19.0 to 25.5  |

|  |      |        |          |      |               |      |               |       |                |      |              |
|--|------|--------|----------|------|---------------|------|---------------|-------|----------------|------|--------------|
|  | 2013 | both   | 50 to 54 | 26.1 | 19.9 to 31.9  | 18.7 | 14.6 to 23.5  | 79    | 68.5 to 89.7   | 34.4 | 28.5 to 39.9 |
|  |      | both   | 55 to 59 | 46.7 | 35.3 to 57.1  | 37.8 | 29.7 to 45.4  | 126.9 | 108.8 to 143.8 | 50.8 | 41.5 to 59.1 |
|  |      | both   | 60 to 64 | 92   | 73.0 to 109.5 | 86.4 | 70.2 to 101.1 | 213.6 | 185.6 to 242.8 | 79.9 | 64.3 to 94.6 |
|  |      | male   | 20 to 24 | 0.5  | 0.3 to 0.8    | 0.1  | 0.1 to 0.2    | 3.4   | 2.7 to 4.4     | 0.8  | 0.5 to 1.0   |
|  |      | male   | 25 to 29 | 0.8  | 0.5 to 1.2    | 0.3  | 0.2 to 0.4    | 5     | 3.9 to 6.3     | 1.5  | 1.1 to 2.0   |
|  |      | male   | 30 to 34 | 1.4  | 0.9 to 2.0    | 0.5  | 0.3 to 0.8    | 8     | 6.3 to 10.4    | 2.9  | 2.1 to 3.7   |
|  |      | male   | 35 to 39 | 2.2  | 1.4 to 3.0    | 1    | 0.6 to 1.4    | 12.6  | 10.2 to 15.7   | 5.3  | 4.0 to 7.0   |
|  |      | male   | 40 to 44 | 4.1  | 2.7 to 5.8    | 2    | 1.3 to 2.9    | 21.9  | 17.6 to 27.2   | 9.5  | 7.1 to 11.8  |
|  |      | male   | 45 to 49 | 8.7  | 6.0 to 11.8   | 4.6  | 3.1 to 6.3    | 39.6  | 32.3 to 48.9   | 16.6 | 13.0 to 20.8 |
|  |      | male   | 50 to 54 | 25.9 | 18.8 to 33.4  | 16.1 | 11.9 to 21.5  | 63.1  | 51.3 to 78.1   | 25.3 | 19.1 to 31.7 |
|  |      | male   | 55 to 59 | 49.3 | 33.7 to 63.0  | 32.9 | 25.0 to 42.3  | 104.9 | 85.7 to 130.9  | 37.5 | 28.7 to 46.8 |
|  |      | male   | 60 to 64 | 97.1 | 69.7 to 120.8 | 68   | 53.7 to 85.3  | 180.1 | 145.5 to 227.9 | 57   | 42.3 to 71.3 |
|  |      | female | 20 to 24 | 0.4  | 0.2 to 0.6    | 0.1  | 0.1 to 0.1    | 1.8   | 1.3 to 2.4     | 0.5  | 0.4 to 0.7   |
|  |      | female | 25 to 29 | 0.5  | 0.3 to 0.8    | 0.1  | 0.1 to 0.2    | 2.7   | 2.0 to 3.8     | 0.9  | 0.7 to 1.3   |
|  |      | female | 30 to 34 | 0.9  | 0.5 to 1.3    | 0.3  | 0.2 to 0.4    | 4.8   | 3.5 to 6.2     | 1.6  | 1.2 to 2.2   |
|  |      | female | 35 to 39 | 1.3  | 0.8 to 1.9    | 0.5  | 0.3 to 0.7    | 7.4   | 5.6 to 9.3     | 3    | 2.3 to 4.0   |
|  |      | female | 40 to 44 | 2.5  | 1.5 to 3.2    | 0.9  | 0.6 to 1.3    | 14.3  | 10.7 to 17.1   | 5.6  | 4.5 to 7.5   |
|  |      | female | 45 to 49 | 4.8  | 2.9 to 6.5    | 1.9  | 1.3 to 2.8    | 27    | 20.8 to 31.6   | 10.3 | 8.7 to 13.9  |
|  |      | female | 50 to 54 | 15.5 | 9.9 to 19.6   | 6.5  | 5.1 to 10.2   | 43.5  | 33.5 to 51.6   | 15.5 | 13.0 to 21.5 |
|  |      | female | 55 to 59 | 29   | 18.7 to 36.8  | 14.2 | 10.9 to 21.8  | 69.7  | 54.9 to 84.6   | 22.7 | 19.1 to 31.7 |
|  |      | female | 60 to 64 | 60.6 | 39.8 to 75.0  | 31.3 | 24.5 to 45.9  | 123.9 | 100.6 to 148.5 | 33.8 | 28.5 to 47.3 |
|  |      | both   | 20 to 24 | 0.4  | 0.3 to 0.6    | 0.1  | 0.1 to 0.1    | 2.6   | 2.2 to 3.2     | 0.6  | 0.5 to 0.8   |
|  |      | both   | 25 to 29 | 0.7  | 0.5 to 0.9    | 0.2  | 0.1 to 0.3    | 3.9   | 3.2 to 4.7     | 1.2  | 1.0 to 1.5   |
|  |      | both   | 30 to 34 | 1.2  | 0.8 to 1.5    | 0.4  | 0.3 to 0.5    | 6.4   | 5.3 to 7.7     | 2.2  | 1.8 to 2.7   |
|  |      | both   | 35 to 39 | 1.7  | 1.2 to 2.3    | 0.7  | 0.5 to 1.0    | 10    | 8.5 to 11.8    | 4.2  | 3.4 to 5.1   |
|  |      | both   | 40 to 44 | 3.3  | 2.4 to 4.3    | 1.5  | 1.1 to 1.9    | 18.1  | 15.4 to 21.1   | 7.6  | 6.3 to 8.9   |
|  |      | both   | 45 to 49 | 6.8  | 5.1 to 8.4    | 3.3  | 2.5 to 4.2    | 33.4  | 28.9 to 38.7   | 13.4 | 11.3 to 15.9 |
|  |      | both   | 50 to 54 | 20.7 | 15.8 to 25.2  | 11.2 | 8.9 to 14.6   | 53.3  | 45.8 to 61.7   | 20.3 | 17.1 to 24.0 |
|  |      | both   | 55 to 59 | 39.2 | 29.2 to 47.1  | 23.2 | 19.1 to 29.5  | 87.4  | 75.6 to 102.7  | 29.8 | 25.1 to 35.1 |

|  |  |      |          |      |              |      |              |       |                |      |              |
|--|--|------|----------|------|--------------|------|--------------|-------|----------------|------|--------------|
|  |  | both | 60 to 64 | 78.7 | 59.3 to 92.6 | 48.6 | 40.9 to 59.4 | 151.7 | 133.0 to 175.6 | 44.7 | 38.0 to 54.0 |
|--|--|------|----------|------|--------------|------|--------------|-------|----------------|------|--------------|

|            | Year | Sex    | Age      | Ischaemic Stroke |                |           |                  | Haemorrhagic Stroke |                |           |                |
|------------|------|--------|----------|------------------|----------------|-----------|------------------|---------------------|----------------|-----------|----------------|
|            |      |        |          | Developing       |                | Developed |                  | Developing          |                | Developed |                |
|            |      |        |          | Mean             | 95% UI         | Mean      | 95% UI           | Mean                | 95% UI         | Mean      | 95% UI         |
| Prevalence | 1990 | male   | 20 to 24 | 9                | 7.8 to 10.4    | 27.3      | 24.5 to 31.0     | 13.6                | 12.3 to 14.8   | 15.4      | 13.3 to 17.5   |
|            |      | male   | 25 to 29 | 16.4             | 14.5 to 18.5   | 47.8      | 43.1 to 53.3     | 23                  | 21.2 to 24.9   | 24.9      | 21.6 to 28.4   |
|            |      | male   | 30 to 34 | 28.4             | 25.2 to 31.9   | 81.2      | 73.2 to 89.8     | 36                  | 33.3 to 39.2   | 35.6      | 31.3 to 41.1   |
|            |      | male   | 35 to 39 | 41.7             | 36.8 to 47.4   | 123.3     | 110.3 to 137.9   | 52                  | 47.3 to 57.2   | 49.4      | 42.1 to 58.7   |
|            |      | male   | 40 to 44 | 69.3             | 61.8 to 78.0   | 197.2     | 177.3 to 220.4   | 69.5                | 63.7 to 75.9   | 61.2      | 53.3 to 71.5   |
|            |      | male   | 45 to 49 | 124.5            | 111.3 to 136.9 | 340.3     | 308.3 to 375.4   | 110.2               | 102.0 to 120.7 | 89.4      | 76.5 to 106.7  |
|            |      | male   | 50 to 54 | 216.5            | 196.2 to 236.3 | 551.2     | 502.2 to 602.4   | 175.4               | 162.6 to 190.2 | 114.1     | 98.6 to 133.8  |
|            |      | male   | 55 to 59 | 366              | 333.9 to 397.1 | 938.2     | 860.1 to 1013.6  | 287.3               | 262.8 to 306.8 | 174.4     | 150.6 to 202.8 |
|            |      | male   | 60 to 64 | 575              | 521.4 to 626.8 | 1473      | 1341.5 to 1624.7 | 410.1               | 378.8 to 440.9 | 249.6     | 215.8 to 292.7 |
|            |      | female | 20 to 24 | 7                | 6.1 to 7.9     | 21.8      | 18.9 to 24.8     | 9.5                 | 8.7 to 10.3    | 11.7      | 10.0 to 14.0   |
|            |      | female | 25 to 29 | 13.2             | 11.8 to 14.7   | 38.3      | 33.3 to 43.5     | 16.4                | 15.1 to 17.6   | 20.3      | 17.4 to 24.0   |
|            |      | female | 30 to 34 | 23.5             | 21.2 to 26.2   | 63.4      | 55.2 to 72.1     | 26.2                | 24.2 to 28.6   | 32.2      | 27.8 to 38.0   |
|            |      | female | 35 to 39 | 35.3             | 31.4 to 40.0   | 95.3      | 81.9 to 110.7    | 38.3                | 34.7 to 42.6   | 47.7      | 40.9 to 56.2   |
|            |      | female | 40 to 44 | 59               | 52.8 to 66.2   | 150.7     | 131.3 to 176.1   | 51.3                | 46.9 to 56.4   | 61.5      | 52.7 to 73.0   |
|            |      | female | 45 to 49 | 104              | 93.1 to 116.4  | 247.9     | 220.7 to 286.7   | 80.2                | 73.5 to 86.8   | 86.6      | 74.0 to 101.2  |
|            |      | female | 50 to 54 | 172.7            | 154.8 to 192.2 | 375.7     | 338.2 to 424.4   | 126                 | 115.4 to 136.5 | 105.5     | 90.7 to 122.0  |
|            |      | female | 55 to 59 | 273.9            | 251.0 to 298.1 | 612       | 551.0 to 688.7   | 201.1               | 184.5 to 219.4 | 154       | 129.0 to 182.8 |
|            |      | female | 60 to 64 | 407.8            | 376.8 to 441.8 | 938.8     | 835.2 to 1066.1  | 281.2               | 261.8 to 303.0 | 199.5     | 166.5 to 231.3 |
|            |      | both   | 20 to 24 | 8                | 7.2 to 8.8     | 24.6      | 22.2 to 26.9     | 11.6                | 10.8 to 12.2   | 13.6      | 12.2 to 15.1   |
|            |      | both   | 25 to 29 | 14.9             | 13.7 to 16.0   | 43.1      | 39.1 to 46.7     | 19.8                | 18.7 to 20.9   | 22.7      | 20.3 to 25.2   |
|            |      | both   | 30 to 34 | 26               | 24.1 to 28.2   | 72.3      | 66.4 to 79.0     | 31.3                | 29.5 to 33.1   | 33.9      | 30.4 to 37.7   |
|            |      | both   | 35 to 39 | 38.6             | 35.3 to 42.5   | 109.3     | 99.6 to 120.9    | 45.4                | 42.3 to 48.7   | 48.5      | 43.1 to 54.8   |
|            |      | both   | 40 to 44 | 64.3             | 59.6 to 70.0   | 173.9     | 158.8 to 191.7   | 60.5                | 56.8 to 64.4   | 61.4      | 54.9 to 68.7   |

|  |      |        |          |       |                |        |                  |       |                |       |                |
|--|------|--------|----------|-------|----------------|--------|------------------|-------|----------------|-------|----------------|
|  |      | both   | 45 to 49 | 114.5 | 105.9 to 124.8 | 293.6  | 272.2 to 319.1   | 95.4  | 89.7 to 101.4  | 88    | 77.8 to 98.8   |
|  |      | both   | 50 to 54 | 194.9 | 181.1 to 211.8 | 461    | 431.3 to 493.6   | 151   | 142.0 to 159.8 | 109.7 | 99.0 to 122.1  |
|  |      | both   | 55 to 59 | 320.2 | 299.5 to 339.4 | 768    | 715.8 to 819.4   | 244.5 | 231.1 to 258.1 | 163.8 | 146.4 to 182.7 |
|  |      | both   | 60 to 64 | 491   | 461.8 to 522.0 | 1182.5 | 1097.0 to 1269.9 | 345.4 | 328.1 to 364.1 | 222.3 | 195.9 to 245.1 |
|  |      | both   | 60 to 64 | 563.7 | 533.5 to 596.7 | 1636.4 | 1567.9 to 1706.8 | 368.4 | 350.4 to 386.6 | 319.2 | 293.0 to 344.6 |
|  | 2013 | male   | 20 to 24 | 9.7   | 8.5 to 11.4    | 48.3   | 41.6 to 55.1     | 12.7  | 11.5 to 14.3   | 25.5  | 21.2 to 30.7   |
|  |      | male   | 25 to 29 | 17.1  | 15.2 to 19.3   | 75.6   | 66.5 to 85.1     | 22    | 20.0 to 24.4   | 38.7  | 32.5 to 45.5   |
|  |      | male   | 30 to 34 | 29.8  | 26.4 to 34.0   | 121.6  | 109.7 to 133.2   | 34.2  | 31.2 to 37.9   | 55.5  | 48.2 to 63.8   |
|  |      | male   | 35 to 39 | 44.4  | 39.1 to 51.7   | 171.5  | 155.0 to 189.9   | 50    | 45.5 to 55.7   | 74.1  | 63.7 to 87.4   |
|  |      | male   | 40 to 44 | 69.5  | 62.1 to 79.6   | 283.7  | 258.2 to 312.3   | 69.2  | 63.5 to 76.0   | 87.9  | 75.6 to 102.9  |
|  |      | male   | 45 to 49 | 121.5 | 109.3 to 136.4 | 474.7  | 436.0 to 515.3   | 111.8 | 102.4 to 121.9 | 117.7 | 99.5 to 137.5  |
|  |      | male   | 50 to 54 | 211.8 | 191.2 to 235.3 | 785    | 723.1 to 851.9   | 175.9 | 160.7 to 190.8 | 157.8 | 136.8 to 178.9 |
|  |      | male   | 55 to 59 | 354.9 | 324.4 to 388.7 | 1258.3 | 1176.5 to 1358.1 | 284.6 | 259.5 to 307.1 | 227   | 198.8 to 256.9 |
|  |      | male   | 60 to 64 | 559.2 | 514.8 to 608.0 | 1855.4 | 1729.9 to 2000.0 | 415.9 | 381.4 to 452.1 | 320.1 | 280.9 to 365.3 |
|  |      | female | 20 to 24 | 7.4   | 6.5 to 8.3     | 41.5   | 35.0 to 48.0     | 8.8   | 7.9 to 9.8     | 21.8  | 17.4 to 26.6   |
|  |      | female | 25 to 29 | 13.7  | 12.2 to 15.3   | 67.5   | 59.1 to 76.6     | 15.3  | 14.0 to 16.9   | 37.2  | 30.1 to 44.5   |
|  |      | female | 30 to 34 | 24.2  | 21.6 to 27.4   | 113.3  | 101.3 to 126.0   | 24.6  | 22.5 to 27.3   | 62.4  | 53.1 to 72.4   |
|  |      | female | 35 to 39 | 36    | 31.7 to 41.4   | 162    | 144.0 to 183.7   | 36.5  | 33.3 to 40.8   | 88.7  | 73.9 to 105.0  |
|  |      | female | 40 to 44 | 56.1  | 49.9 to 63.3   | 267.7  | 241.7 to 301.4   | 49.5  | 45.6 to 54.1   | 118   | 100.5 to 136.9 |
|  |      | female | 45 to 49 | 96.4  | 86.5 to 109.0  | 419.5  | 384.5 to 462.8   | 78    | 71.2 to 84.5   | 154.2 | 131.0 to 181.0 |
|  |      | female | 50 to 54 | 163.4 | 146.0 to 187.8 | 640.6  | 589.5 to 699.0   | 121.6 | 111.3 to 132.8 | 194.9 | 167.8 to 225.6 |
|  |      | female | 55 to 59 | 266.4 | 240.6 to 300.9 | 944.3  | 869.6 to 1032.7  | 193.6 | 178.1 to 211.4 | 253.4 | 217.6 to 295.9 |
|  |      | female | 60 to 64 | 405.4 | 371.5 to 443.8 | 1302.3 | 1206.9 to 1417.5 | 279.1 | 260.1 to 299.4 | 308.8 | 270.6 to 354.7 |
|  |      | both   | 20 to 24 | 8.6   | 7.7 to 9.6     | 44.9   | 40.5 to 50.0     | 10.8  | 10.1 to 11.7   | 23.7  | 20.5 to 26.9   |
|  |      | both   | 25 to 29 | 15.4  | 14.2 to 16.8   | 71.6   | 65.5 to 78.3     | 18.7  | 17.6 to 20.0   | 38    | 33.4 to 42.8   |
|  |      | both   | 30 to 34 | 27.1  | 24.8 to 29.4   | 117.5  | 108.6 to 126.4   | 29.5  | 27.6 to 31.5   | 58.9  | 53.1 to 65.5   |
|  |      | both   | 35 to 39 | 40.3  | 36.6 to 44.1   | 166.7  | 153.6 to 180.6   | 43.4  | 40.4 to 46.4   | 81.4  | 71.8 to 91.4   |
|  |      | both   | 40 to 44 | 62.9  | 58.0 to 68.3   | 275.7  | 257.5 to 297.5   | 59.5  | 55.6 to 63.2   | 103   | 92.0 to 114.3  |
|  |      | both   | 45 to 49 | 109   | 100.8 to 118.4 | 446.8  | 421.5 to 475.4   | 95.1  | 88.7 to 100.9  | 136.1 | 120.3 to 152.9 |

|             |             |            |            |                         |                  |                  |                  |                            |                  |                  |                  |
|-------------|-------------|------------|------------|-------------------------|------------------|------------------|------------------|----------------------------|------------------|------------------|------------------|
|             |             | both       | 50 to 54   | 187.7                   | 174.3 to 205.3   | 711.1            | 670.8 to 754.6   | 148.9                      | 138.6 to 158.1   | 176.8            | 158.1 to 195.2   |
|             |             | both       | 55 to 59   | 310.8                   | 289.4 to 339.0   | 1094.7           | 1035.6 to 1158.2 | 239.3                      | 222.7 to 255.1   | 240.8            | 216.2 to 266.4   |
|             |             | both       | 60 to 64   | 481.5                   | 452.2 to 516.2   | 1562.7           | 1487.9 to 1653.6 | 346.7                      | 327.3 to 366.8   | 314.1            | 287.3 to 342.8   |
|             |             |            |            | <b>Ischaemic Stroke</b> |                  |                  |                  | <b>Haemorrhagic Stroke</b> |                  |                  |                  |
|             |             |            |            | <b>Developing</b>       |                  | <b>Developed</b> |                  | <b>Developing</b>          |                  | <b>Developed</b> |                  |
|             |             |            |            |                         |                  |                  |                  |                            |                  |                  |                  |
|             | <b>Year</b> | <b>Sex</b> | <b>Age</b> |                         | <b>95% UI</b>    |                  | <b>95% UI</b>    |                            | <b>95% UI</b>    |                  | <b>95% UI</b>    |
| <b>DALY</b> | 1990        | male       | 20 to 24   | 44                      | 28.3 to 63.0     | 16.4             | 12.7 to 22.2     | 324.4                      | 258.2 to 404.7   | 84.7             | 66.8 to 104.6    |
|             |             | male       | 25 to 29   | 60.7                    | 40.4 to 86.2     | 27.1             | 20.7 to 36.3     | 424.3                      | 336.5 to 517.8   | 131.4            | 104.1 to 163.2   |
|             |             | male       | 30 to 34   | 100.6                   | 66.9 to 147.4    | 51.1             | 39.0 to 69.1     | 617.1                      | 495.0 to 771.9   | 238              | 188.6 to 303.0   |
|             |             | male       | 35 to 39   | 144                     | 92.2 to 195.3    | 90.7             | 67.9 to 124.3    | 916.2                      | 740.7 to 1123.8  | 414.8            | 328.7 to 530.4   |
|             |             | male       | 40 to 44   | 249.8                   | 156.6 to 345.6   | 168.6            | 121.0 to 238.0   | 1383.6                     | 1100.2 to 1677.4 | 680.9            | 534.3 to 857.7   |
|             |             | male       | 45 to 49   | 443.8                   | 290.1 to 617.0   | 319.2            | 231.6 to 422.0   | 2137.9                     | 1737.5 to 2577.9 | 1034.2           | 834.9 to 1284.4  |
|             |             | male       | 50 to 54   | 1090.7                  | 758.6 to 1424.7  | 940.7            | 695.4 to 1204.0  | 3095.8                     | 2521.7 to 3706.3 | 1403.7           | 1082.5 to 1751.5 |
|             |             | male       | 55 to 59   | 1723.2                  | 1191.9 to 2230.6 | 1633.4           | 1246.0 to 2046.8 | 4393.2                     | 3620.3 to 5204.7 | 1833.3           | 1413.9 to 2334.2 |
|             |             | male       | 60 to 64   | 2821.5                  | 2040.3 to 3643.7 | 3050.4           | 2351.2 to 3712.7 | 6241.8                     | 5078.9 to 7366.1 | 2438             | 1789.9 to 3179.4 |
|             |             | female     | 20 to 24   | 38.3                    | 21.8 to 68.4     | 16.2             | 12.0 to 21.8     | 198.8                      | 139.7 to 259.9   | 72.2             | 54.4 to 96.0     |
|             |             | female     | 25 to 29   | 51.4                    | 30.3 to 89.6     | 22               | 17.2 to 30.9     | 274.7                      | 201.0 to 359.2   | 105.1            | 83.2 to 140.0    |
|             |             | female     | 30 to 34   | 77.6                    | 47.2 to 129.5    | 36               | 27.7 to 49.7     | 430.9                      | 325.9 to 540.9   | 167.1            | 131.9 to 221.7   |
|             |             | female     | 35 to 39   | 111.5                   | 72.6 to 170.6    | 54.8             | 41.6 to 74.8     | 654.1                      | 520.0 to 835.1   | 274.8            | 213.4 to 351.2   |
|             |             | female     | 40 to 44   | 187.9                   | 121.5 to 271.3   | 96.7             | 71.4 to 128.4    | 1111.5                     | 901.8 to 1369.2  | 465.1            | 365.3 to 577.4   |
|             |             | female     | 45 to 49   | 307.3                   | 214.7 to 431.6   | 173.8            | 127.6 to 229.3   | 1752.8                     | 1421.7 to 2156.0 | 743              | 573.4 to 878.8   |
|             |             | female     | 50 to 54   | 798.4                   | 566.8 to 1053.4  | 521.2            | 378.1 to 679.3   | 2491.5                     | 2043.7 to 3015.6 | 1050.6           | 797.9 to 1223.4  |
|             |             | female     | 55 to 59   | 1213                    | 830.5 to 1631.0  | 931.6            | 676.6 to 1157.8  | 3401.5                     | 2744.7 to 4055.0 | 1331             | 979.0 to 1572.8  |
|             |             | female     | 60 to 64   | 2100.1                  | 1464.2 to 2782.6 | 1880.4           | 1404.9 to 2237.8 | 4939.4                     | 4058.3 to 6050.0 | 1822.3           | 1374.8 to 2164.0 |
|             |             | both       | 20 to 24   | 41.2                    | 29.9 to 58.6     | 16.3             | 13.4 to 20.6     | 263.1                      | 217.9 to 312.4   | 78.6             | 67.0 to 92.6     |
|             |             | both       | 25 to 29   | 56.2                    | 41.6 to 76.5     | 24.6             | 20.2 to 31.4     | 351.2                      | 292.5 to 414.4   | 118.3            | 99.7 to 139.8    |
|             |             | both       | 30 to 34   | 89.4                    | 67.3 to 119.1    | 43.6             | 35.8 to 56.7     | 526.6                      | 446.3 to 618.3   | 202.7            | 173.3 to 243.3   |

|  |      |        |          |        |                  |        |                  |        |                  |        |                  |
|--|------|--------|----------|--------|------------------|--------|------------------|--------|------------------|--------|------------------|
|  |      | both   | 35 to 39 | 128.3  | 97.9 to 166.3    | 72.7   | 58.6 to 94.9     | 789.2  | 679.9 to 924.1   | 344.8  | 296.0 to 409.2   |
|  |      | both   | 40 to 44 | 219.4  | 164.4 to 273.9   | 132.6  | 105.2 to 172.3   | 1250   | 1086.8 to 1424.2 | 572.8  | 491.7 to 672.5   |
|  |      | both   | 45 to 49 | 376.7  | 277.7 to 473.9   | 245.7  | 194.9 to 304.9   | 1948.6 | 1695.1 to 2237.2 | 886.9  | 770.4 to 1028.7  |
|  |      | both   | 50 to 54 | 946.5  | 723.2 to 1149.8  | 725.1  | 581.4 to 892.6   | 2797.7 | 2428.0 to 3172.4 | 1222.2 | 1014.5 to 1415.9 |
|  |      | both   | 55 to 59 | 1469.7 | 1127.4 to 1787.5 | 1266.9 | 1031.4 to 1498.2 | 3900.3 | 3356.2 to 4416.0 | 1571   | 1284.4 to 1823.5 |
|  |      | both   | 60 to 64 | 2459.2 | 1965.2 to 2927.0 | 2413.3 | 1991.4 to 2795.4 | 5587.7 | 4869.9 to 6337.7 | 2102.8 | 1700.8 to 2483.5 |
|  | 2013 | male   | 20 to 24 | 35.7   | 24.0 to 50.3     | 14.8   | 10.5 to 19.8     | 221.6  | 174.0 to 285.2   | 52.9   | 38.4 to 67.6     |
|  |      | male   | 25 to 29 | 50.8   | 33.7 to 71.5     | 27.4   | 20.0 to 35.9     | 300.2  | 235.4 to 379.2   | 96.4   | 72.3 to 122.5    |
|  |      | male   | 30 to 34 | 83     | 56.3 to 115.8    | 47.8   | 35.4 to 63.2     | 442.3  | 348.3 to 568.9   | 164.1  | 121.7 to 211.5   |
|  |      | male   | 35 to 39 | 114.7  | 77.9 to 158.0    | 74.5   | 54.8 to 98.0     | 630.6  | 513.9 to 786.0   | 275.6  | 209.6 to 357.0   |
|  |      | male   | 40 to 44 | 196.1  | 131.8 to 269.2   | 134.2  | 97.5 to 176.8    | 986.9  | 797.3 to 1223.1  | 438.1  | 330.8 to 544.2   |
|  |      | male   | 45 to 49 | 364.3  | 258.6 to 491.0   | 257.7  | 192.0 to 332.1   | 1595.2 | 1303.1 to 1959.2 | 680.4  | 531.3 to 847.4   |
|  |      | male   | 50 to 54 | 942.6  | 696.1 to 1205.3  | 684    | 532.3 to 881.6   | 2242.4 | 1829.7 to 2768.5 | 910.6  | 692.6 to 1138.3  |
|  |      | male   | 55 to 59 | 1555.9 | 1075.1 to 1963.2 | 1191.3 | 936.1 to 1476.6  | 3238.3 | 2650.0 to 4029.7 | 1176.4 | 899.6 to 1462.8  |
|  |      | male   | 60 to 64 | 2600.3 | 1881.7 to 3217.9 | 2039.8 | 1660.6 to 2485.1 | 4730.2 | 3828.7 to 5972.4 | 1526.2 | 1137.9 to 1890.8 |
|  |      | female | 20 to 24 | 24.5   | 16.0 to 37.0     | 12.7   | 8.9 to 17.2      | 116.4  | 83.5 to 155.8    | 38     | 27.4 to 49.8     |
|  |      | female | 25 to 29 | 33     | 21.2 to 49.9     | 19.5   | 14.4 to 25.6     | 165.5  | 119.5 to 226.5   | 62     | 47.0 to 81.8     |
|  |      | female | 30 to 34 | 51.5   | 32.8 to 74.3     | 32.5   | 24.2 to 42.0     | 265.3  | 192.5 to 341.0   | 97.6   | 75.0 to 128.6    |
|  |      | female | 35 to 39 | 70.9   | 45.2 to 99.5     | 47.6   | 36.3 to 61.7     | 373.4  | 281.2 to 467.9   | 162.7  | 126.6 to 212.6   |
|  |      | female | 40 to 44 | 118.5  | 73.8 to 153.2    | 81.5   | 62.4 to 102.7    | 644.2  | 486.7 to 773.9   | 268.3  | 216.8 to 355.3   |
|  |      | female | 45 to 49 | 206.5  | 134.4 to 269.6   | 141    | 108.1 to 179.8   | 1086.5 | 840.7 to 1269.8  | 433.5  | 365.6 to 574.2   |
|  |      | female | 50 to 54 | 567.6  | 369.3 to 715.3   | 325.3  | 260.4 to 451.4   | 1543.2 | 1193.6 to 1824.9 | 574.4  | 489.4 to 779.2   |
|  |      | female | 55 to 59 | 922    | 606.3 to 1165.2  | 575    | 459.8 to 810.8   | 2151.6 | 1696.6 to 2604.6 | 728.9  | 620.8 to 1003.9  |
|  |      | female | 60 to 64 | 1629.5 | 1099.6 to 2001.8 | 1002.6 | 815.2 to 1388.5  | 3249   | 2651.5 to 3890.7 | 920.8  | 784.0 to 1270.5  |
|  |      | both   | 20 to 24 | 30.3   | 22.5 to 39.1     | 13.7   | 10.1 to 17.5     | 170.5  | 141.4 to 205.9   | 45.6   | 36.2 to 54.7     |
|  |      | both   | 25 to 29 | 42.1   | 31.0 to 54.0     | 23.5   | 18.3 to 30.0     | 234.3  | 194.5 to 280.2   | 79.4   | 64.9 to 95.5     |
|  |      | both   | 30 to 34 | 67.5   | 49.8 to 86.0     | 40.2   | 31.4 to 50.4     | 355.3  | 296.3 to 426.3   | 131    | 107.8 to 157.1   |
|  |      | both   | 35 to 39 | 93.1   | 67.9 to 120.2    | 61.1   | 47.6 to 75.7     | 503.9  | 427.9 to 591.0   | 219.2  | 183.4 to 264.0   |
|  |      | both   | 40 to 44 | 157.8  | 116.6 to 201.8   | 107.8  | 85.7 to 133.6    | 817.7  | 695.7 to 953.4   | 353.1  | 298.9 to 414.7   |

|  |  |      |          |        |                  |        |                  |        |                  |        |                  |
|--|--|------|----------|--------|------------------|--------|------------------|--------|------------------|--------|------------------|
|  |  | both | 45 to 49 | 286.2  | 217.6 to 353.9   | 198.8  | 160.4 to 246.7   | 1343.3 | 1162.9 to 1556.2 | 555.8  | 470.7 to 657.3   |
|  |  | both | 50 to 54 | 755.9  | 585.8 to 915.0   | 500.5  | 411.6 to 633.5   | 1894.4 | 1628.3 to 2189.8 | 738.6  | 626.6 to 872.1   |
|  |  | both | 55 to 59 | 1239.9 | 940.6 to 1487.8  | 870    | 731.5 to 1084.7  | 2696.7 | 2333.3 to 3166.5 | 943.2  | 799.0 to 1106.7  |
|  |  | both | 60 to 64 | 2109.7 | 1612.4 to 2463.5 | 1491.2 | 1285.1 to 1774.4 | 3981.7 | 3500.4 to 4603.7 | 1205.9 | 1030.2 to 1453.0 |
